# Supplementary material for: Dock10 Regulates Cardiac Function under Neurohormonal Stress
Source: MDPI journal article supplement (doi:10.3390/ijms23179616), 2022-08-25
Supplement: s1 [file s1]

# SUPPLEMENTAL MATERIAL

Liad Segal<sup>1,2</sup>, Sharon Etzion<sup>2</sup>, Sigal Elyagon<sup>1,2</sup>, Moran Shahar<sup>1</sup>, Hadar Klapper-Goldstein<sup>1,2</sup>, Aviva Levitas<sup>3</sup>, Michael S. Kapiloff<sup>6</sup>, Ruti Parvari<sup>4,5</sup> and Yoram Etzion<sup>1, 2</sup>

<sup>1</sup> Department of Physiology and Cell Biology, Ben-Gurion University of the Negev, Beer-Sheva, Israel.

<sup>2</sup> Regenerative Medicine and Stem Cell (RMSC) Research Center, Ben-Gurion University of the Negev, Beer-Sheva, Israel.

<sup>3</sup> Pediatric Cardiology Department, Soroka University Medical Center, Beer-Sheva, Israel.

<sup>4</sup> Department of Microbiology, Immunology and Genetics, Ben-Gurion University of the Negev, Beer-Sheva, Israel.

<sup>5</sup> National Institute for Biotechnology in the Negev, Ben-Gurion University of the Negev, Beer-Sheva, Israel.

<sup>6</sup> Departments of Ophthalmology and Medicine (Cardiovascular Medicine), Stanford Cardiovascular Institute, Stanford University, Palo Alto, CA, USA.

**Abbreviated title:** Role of Dock10 in the heart

**Table S1: Gene primers**

|                                |                               |
|--------------------------------|-------------------------------|
| mActa1r CCACCGATCCACACTGAGTA   | mActa1f AAGTGCGACATCGACATCAG  |
| mActa2r CACCAGGGCTGTGCTGTCTT   | mActa2f AGCCAGTCGCTGTCAGGAA   |
| mNppar AATGTGACCAAGCTGCGTGA    | mNppaf GCTGCAACAGCTTCCGGTA    |
| MNppbr TGGTCCTTCAAGAGCTGTCTC   | MNppbf AGGTGCTGTCCCAGATGATT   |
| mMyh7r TCCACGATGGCGATGTTCT     | mMyh7f CCTCCAGAGTCTGCTGAAGGA  |
| mDock10r TCCAGATCCTTGGGGTTTACC | mDock10f CTGACAGGGCTCTCGGAGAT |
| mDock9r TCCACCCACTTAACCTCTGG   | mDock9f AGAAGAAGGACGCTGTGGAA  |
| mDock11r AGCCACATGGAAACTCATCC  | mDock11f CGCAGTTGTACCTCCCATTT |
| mCol1a1r GACGTGCTTCTTTTCCTTGG  | mCol1a1f TGACTGGAAGAGCGGAGAGT |
| mCol3a1r GTCACCATTCTCCCAGGAA   | mCol3a1f CAATATGCCCACAGCCTTCT |
| mCol1a2r TGGGACCATCAACACCATC   | mCol1a2f TGCTCAGCTTTGTGGATACG |
| mGapdhr CCAATACGGCCAAATCCGT    | mGapdhr TCTTGTGCAGTGCCAGCCT   |

**Table S2: Echocardiography of global Dock10 KO mice following chronic exposure to AngII**

|                     | <b>WT</b>              |                       | <b>KO</b>              |                        | <b>P value</b> |          |
|---------------------|------------------------|-----------------------|------------------------|------------------------|----------------|----------|
|                     | <b>Saline</b><br>(n=8) | <b>AngII</b><br>(n=8) | <b>Saline</b><br>(n=7) | <b>AngII</b><br>(n=10) | <b>#</b>       | <b>*</b> |
| Heart rate (b.p.m.) | 493.1±14.9             | 473.0±25.2            | 493.4±3.1              | 548.5±17.3             | ns             | *        |
| LVIDd (mm)          | 3.94±0.09              | 4.11±0.15             | 3.93±0.12              | 4.13±0.13              | ns             | ns       |
| LVIDs (mm)          | 2.54±0.13              | 2.95±0.18             | 2.61±0.08              | 3.25±0.11              | ns             | **       |
| RWT                 | 0.53±0.02              | 0.56±0.01             | 0.68±0.04              | 0.63±0.06              | ns             | ns       |
| EF%                 | 64.04±2.55             | 54.33±3.15            | 62.60±4.05             | 44.07±2.25             | ns             | ***      |
| FS%                 | 35.42±2.22             | 31.40±2.14            | 33.62±2.85             | 20.92±0.98             | #              | ***      |

**LVIDd** = Left ventricular internal diameter - Diastolic; **LVIDs** = Left ventricular internal diameter- Systolic; **RWT** = Relative wall thickness; **EF** = Ejection fraction; **FS** = Fractional shortening. # Saline vs. AngII in WT mice. \*, \*\*, \*\*\* Saline vs. AngII in KO mice.

**Table S3: Dock10 CKO mice - Gravimetric and echocardiographic data following exposure to AngII**

|                    | <b>Cre<sup>+</sup><br/>(n=10)</b> | <b>Fl/Fl<br/>(n=9)</b> | <b>Cre<sup>+</sup> Fl/Fl<br/>(n=11)</b> | <b>P value</b> |
|--------------------|-----------------------------------|------------------------|-----------------------------------------|----------------|
| HW/BW              | 5.72±0.15                         | 5.95±0.32              | 5.90±0.33                               | ns             |
| HW/TL              | 6.79±0.31                         | 7.49±0.46              | 7.36±0.25                               | ns             |
| Heart rate (b.p.m) | 516.22±31.71                      | 504.511±16.93          | 507.90±22.09                            | ns             |
| LVIDd (mm)         | 3.92±0.13                         | 4.08±0.15              | 4.12±0.10                               | ns             |
| LVIDs (mm)         | 3.15±0.16                         | 3.30±0.16              | 3.32±0.14                               | ns             |
| RWT                | 1.02±0.02                         | 1.03±0.05              | 1.00±0.04                               | ns             |
| EF%                | 40.68±3.89                        | 39.27±2.61             | 39.13±3.34                              | ns             |

**LVIDd** = Left ventricular internal diameter - Diastolic; **LVIDs** = Left ventricular internal diameter- Systolic; **RWT** = Relative wall thickness; **EF** = Ejection fraction. P-value indicate the result of 1 way ANOVA between the 3 groups.
